# Supplementary material
Source: bioRxiv or medRxiv preprint supplement (https://medrxiv.org/highwire/filestream/75951/field_highwire_adjunct_files/0/2020.04.07.20053421-1.pdf)
Supplement: Supplementary file [file 2020.04.07.20053421-1.pdf]

## Supplementary materials for

### Early estimates of COVID-19 infections in small, medium and large population clusters

Siraj DS\*, Siraj AS , Mapes A

\* Corresponding author: [dssiraj@medicine.wisc.edu](mailto:dssiraj@medicine.wisc.edu)

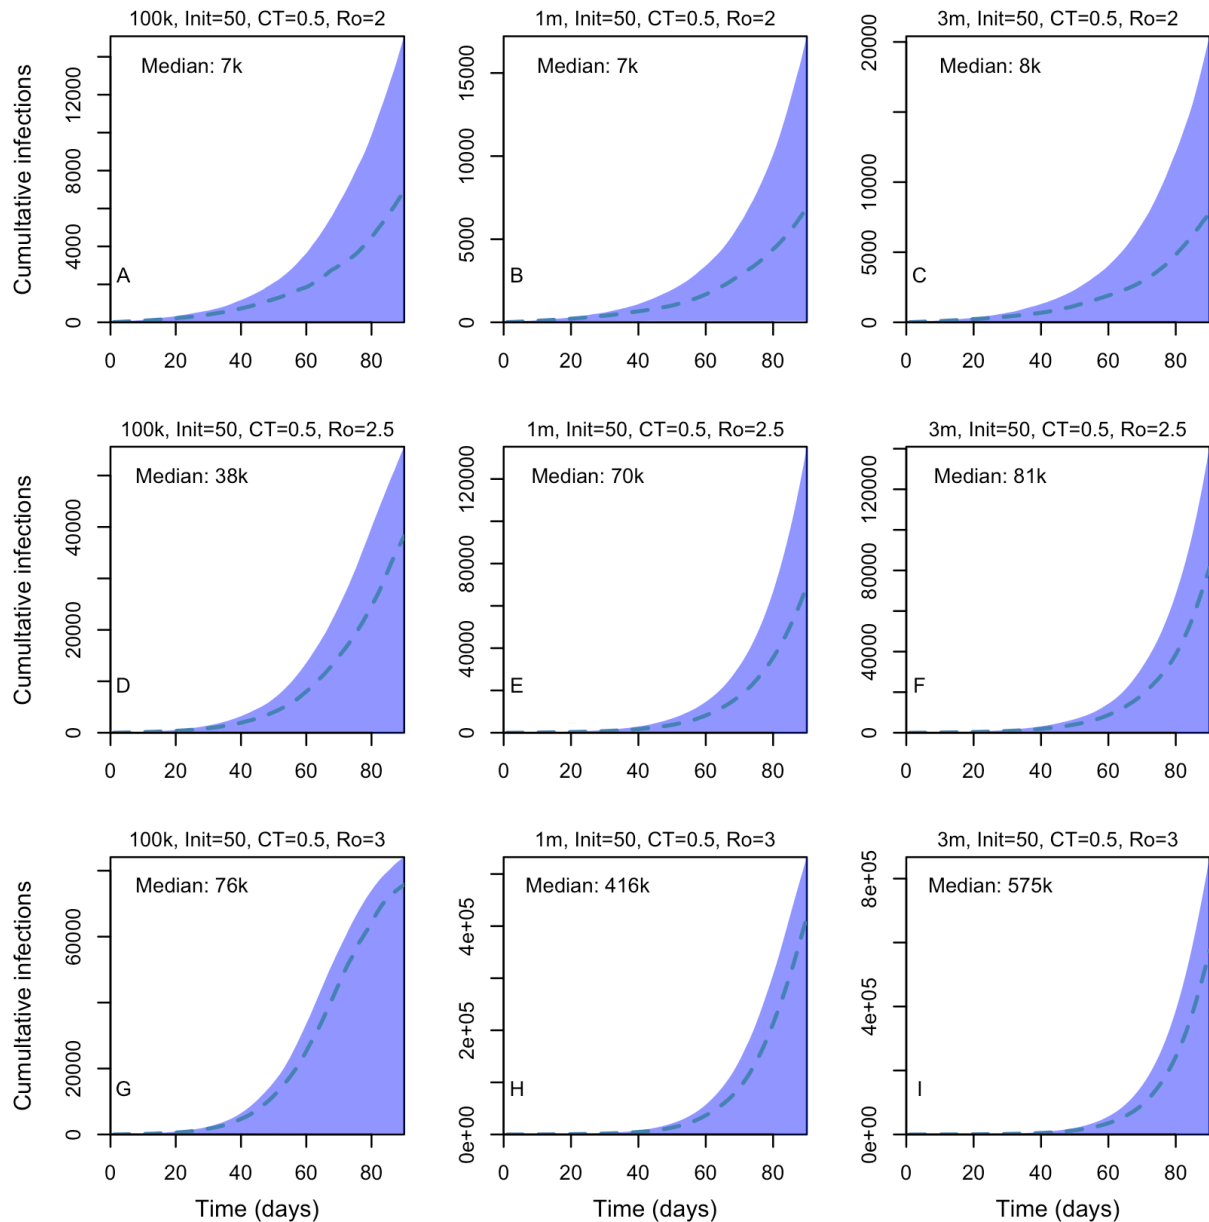

**S1 Figure.** Cumulative number of infections in the initial 90 days with 50% contact tracing and 50 initial cases, assuming  $R_0=2$ , 2.5 and 3 (top to bottom respectively) for the three population sizes (left to right). Broken line shows the median value and blue region shows the 95% confidence interval.

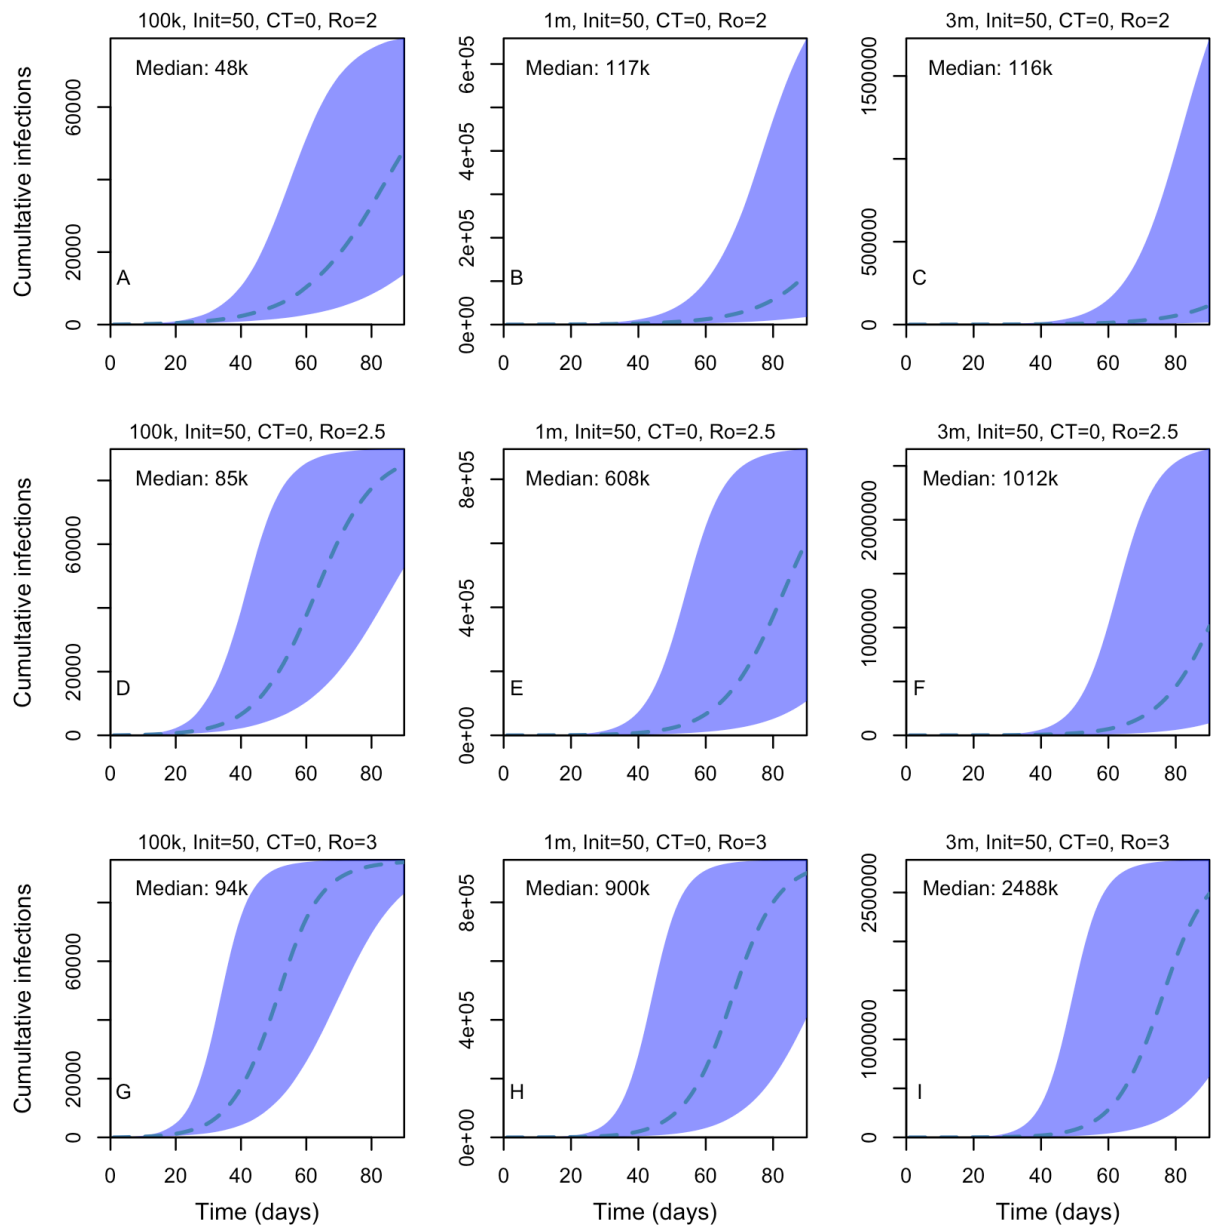

**S2 Figure.** Cumulative number of infections in the initial 90 days with 0% contact tracing and 50 initial cases, assuming  $R_0=2$ , 2.5 and 3 (top to bottom respectively) for the three population sizes (left to right). Broken line shows the median value and blue region shows the 95% confidence interval.

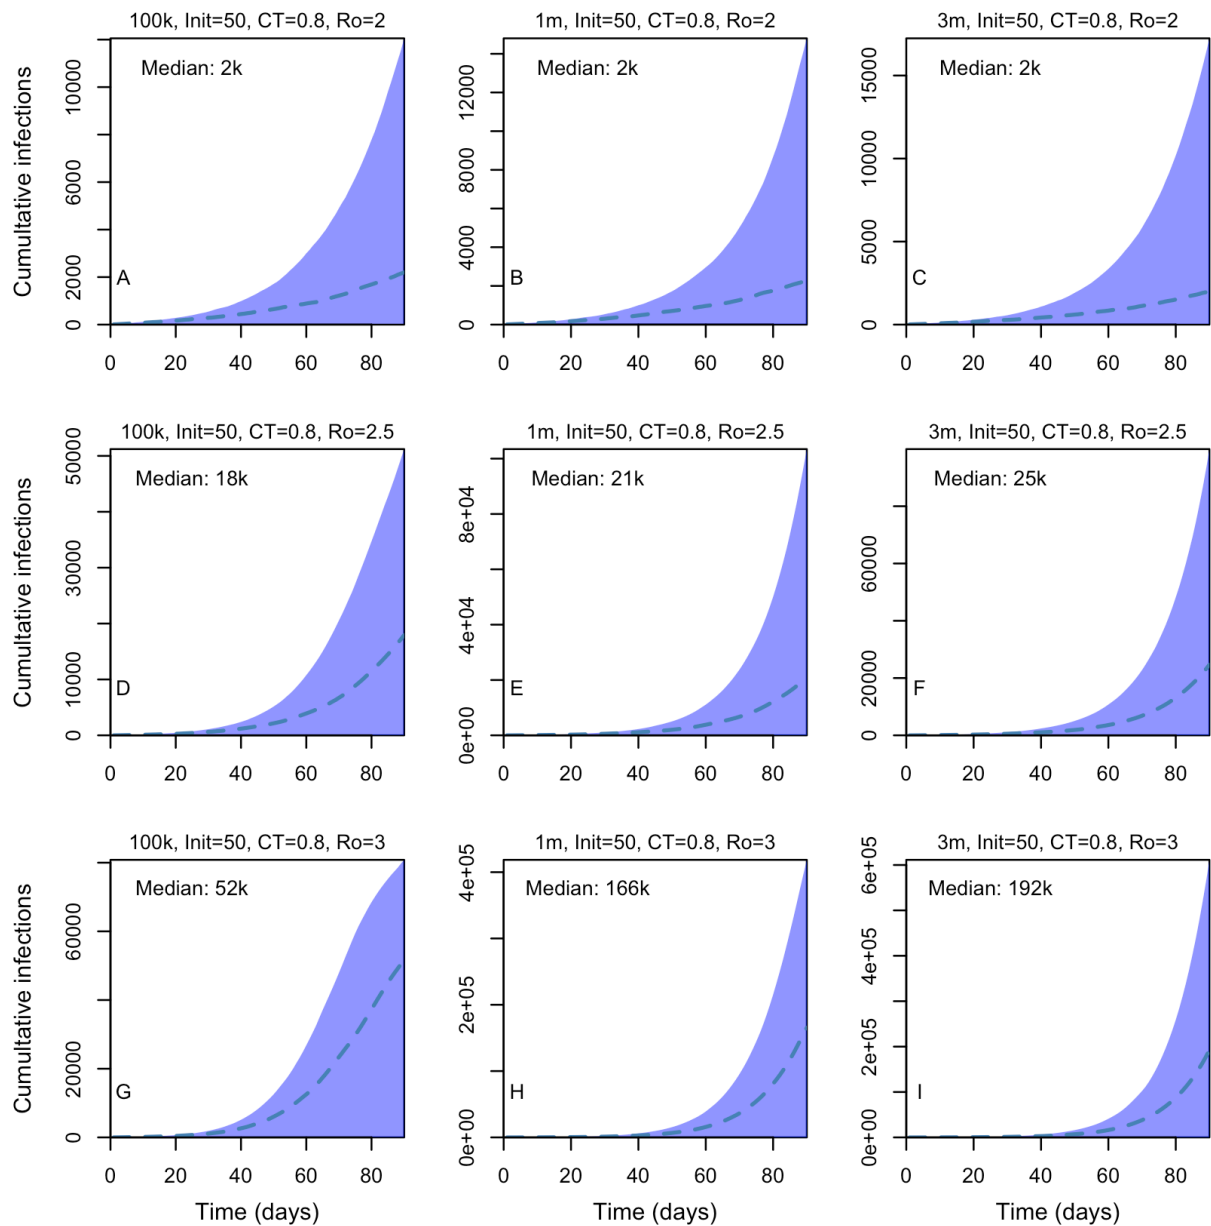

**S3 Figure.** Cumulative number of infections in the initial 90 days with 80% contact tracing and 50 initial cases, assuming  $R_0=2$ , 2.5 and 3 (top to bottom respectively) for the three population sizes (left to right). Broken line shows the median value and blue region shows the 95% confidence interval.

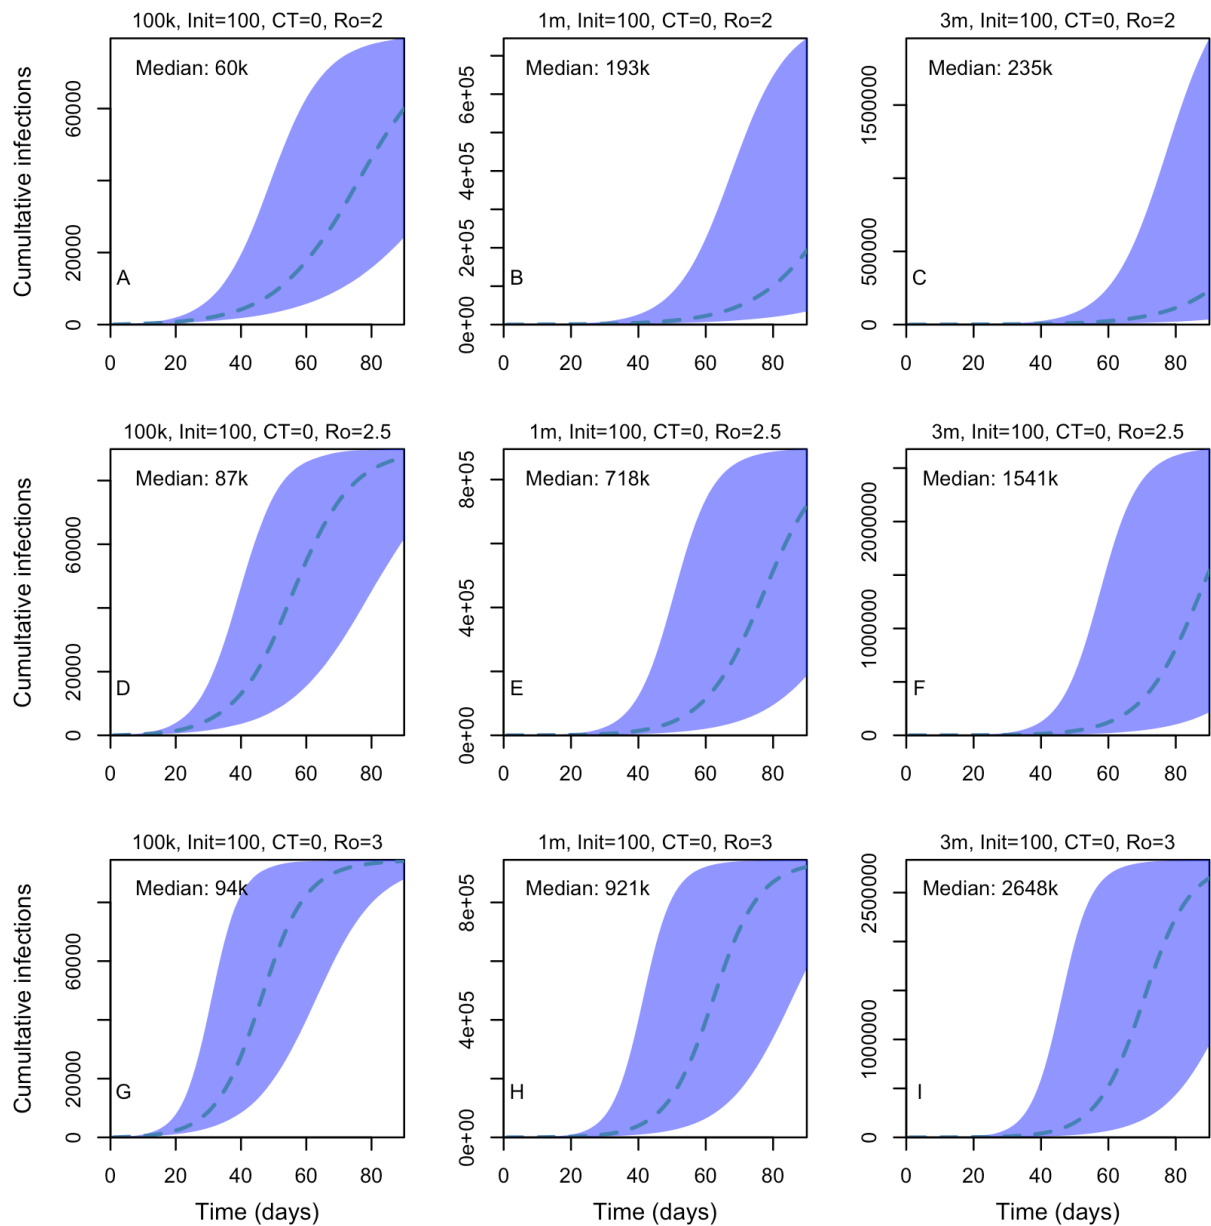

**S4 Figure.** Cumulative number of infections in the initial 90 days with 0% contact tracing and 100 initial cases, assuming  $R_0=2$ , 2.5 and 3 (top to bottom respectively) for the three population sizes (left to right). Broken line shows the median value and blue region shows the 95% confidence interval.

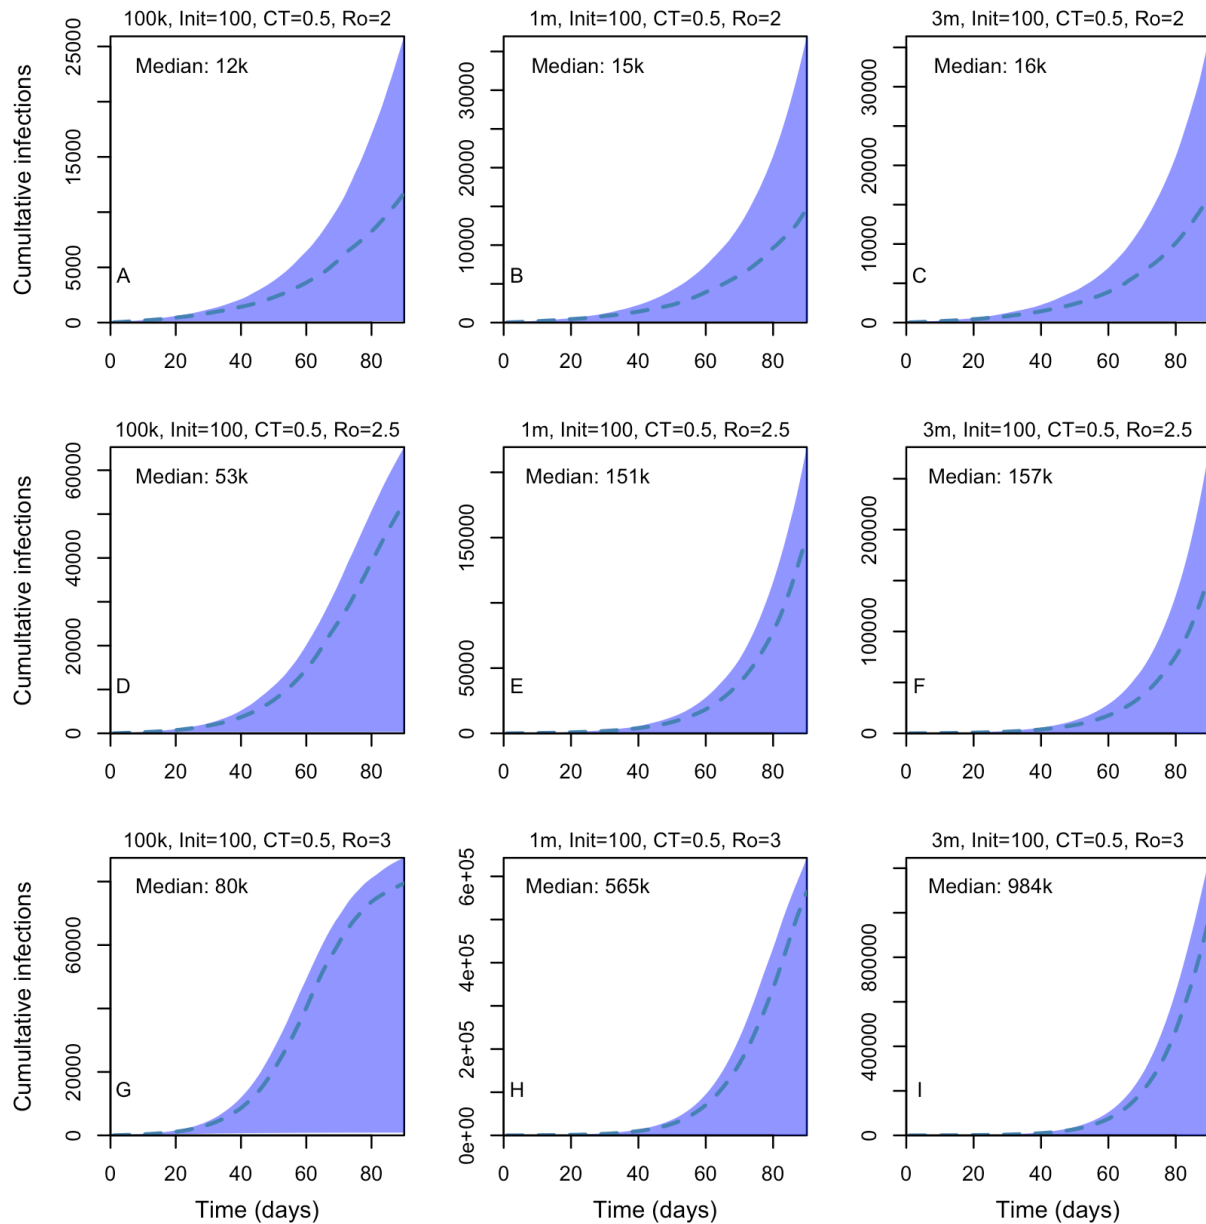

**S5 Figure.** Cumulative number of infections in the initial 90 days with 50% contact tracing and 100 initial cases, assuming  $R_0=2$ , 2.5 and 3 (top to bottom respectively) for the three population sizes (left to right). Broken line shows the median value and blue region shows the 95% confidence interval.

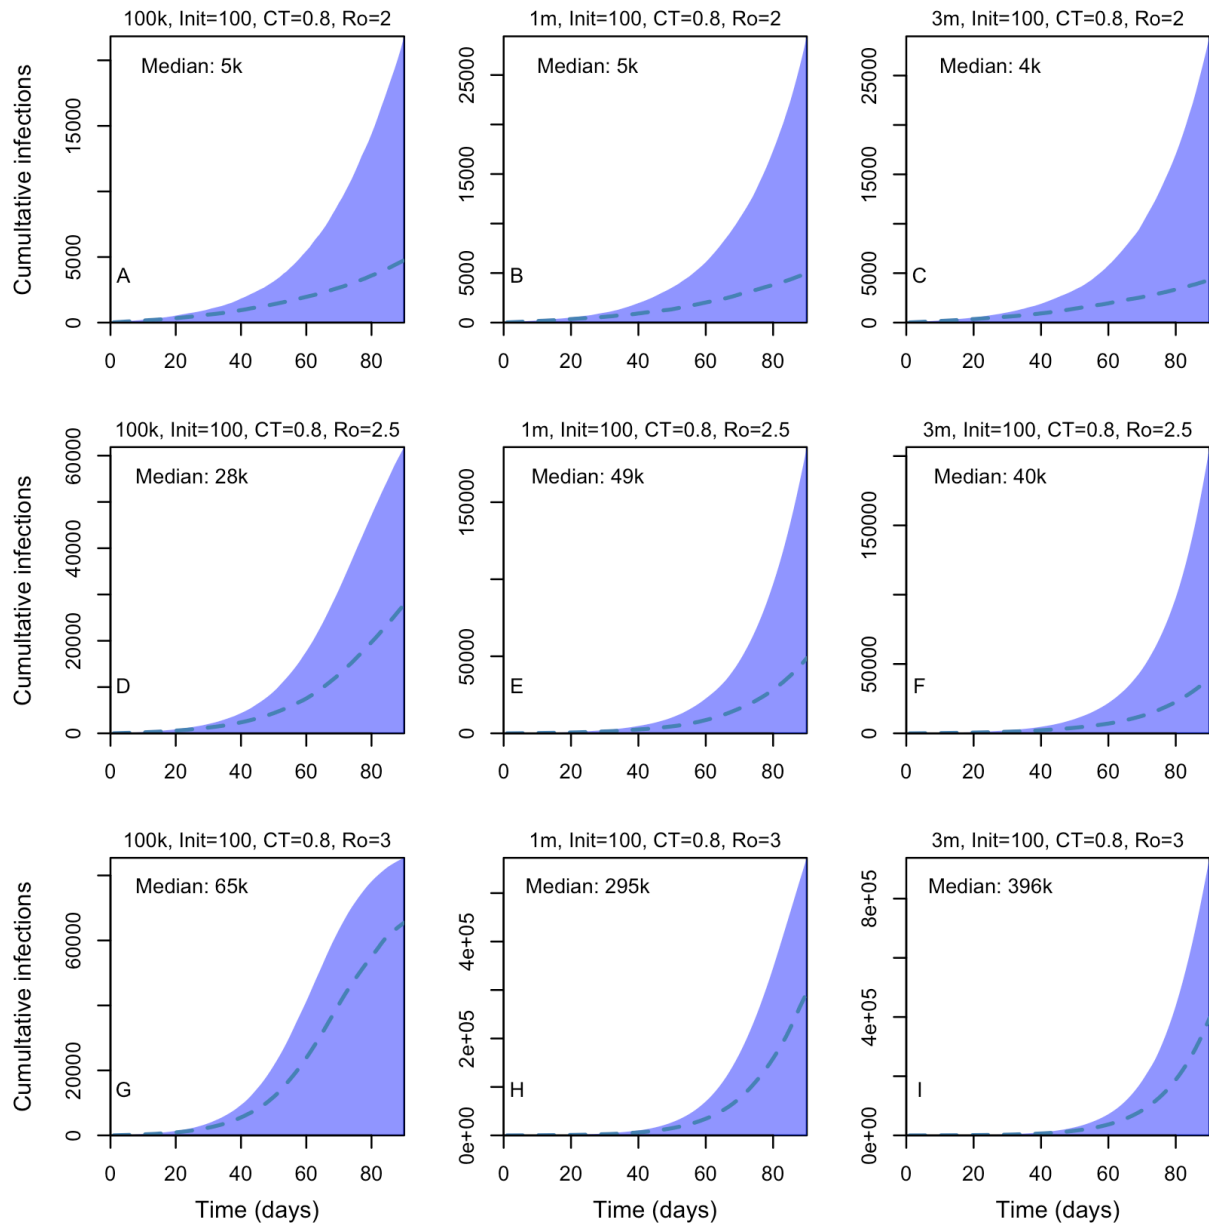

**S6 Figure.** Cumulative number of infections in the initial 90 days with 80% contact tracing and 100 initial cases, assuming  $R_0=2$ , 2.5 and 3 (top to bottom respectively) for the three population sizes (left to right). Broken line shows the median value and blue region shows the 95% confidence interval.

**S1 Table:** Estimated number of infections within the initial 90 days for the different scenarios considered

| <i>Scenario</i> | <i>Cluster size (population)</i> | <i>Coverage of contact tracing</i> | <i>Basic reproduction number, <math>R_0</math></i> | <i>Initial number of cases</i> | <i>Estimates infections by day 90 (in '000) (95% CI)</i> |
|-----------------|----------------------------------|------------------------------------|----------------------------------------------------|--------------------------------|----------------------------------------------------------|
| 1               | 0.1                              | 0                                  | 2                                                  | 50                             | 48.3 (13.9-79)                                           |
| 2               | 0.1                              | 0                                  | 2                                                  | 100                            | 60 (24.3-79.5)                                           |
| 3               | 0.1                              | 0                                  | 2.5                                                | 50                             | 84.9 (52.7-89.9)                                         |
| 4               | 0.1                              | 0                                  | 2.5                                                | 100                            | 87.3 (61.7-89.9)                                         |
| 5               | 0.1                              | 0                                  | 3                                                  | 50                             | 93.7 (83.1-94.5)                                         |
| 6               | 0.1                              | 0                                  | 3                                                  | 100                            | 94.1 (87.9-94.5)                                         |
| 7               | 0.1                              | 0.5                                | 2                                                  | 50                             | 7 (0.1-15.1)                                             |
| 8               | 0.1                              | 0.5                                | 2                                                  | 100                            | 11.7 (0.1-25.9)                                          |
| 9               | 0.1                              | 0.5                                | 2.5                                                | 50                             | 38.2 (0.1-55.6)                                          |
| 10              | 0.1                              | 0.5                                | 2.5                                                | 100                            | 52.5 (0.3-65.3)                                          |
| 11              | 0.1                              | 0.5                                | 3                                                  | 50                             | 75.8 (0.3-84.1)                                          |
| 12              | 0.1                              | 0.5                                | 3                                                  | 100                            | 79.5 (0.9-87.5)                                          |
| 13              | 0.1                              | 0.8                                | 2                                                  | 50                             | 2.2 (0-12.1)                                             |
| 14              | 0.1                              | 0.8                                | 2                                                  | 100                            | 4.8 (0.1-21.8)                                           |
| 15              | 0.1                              | 0.8                                | 2.5                                                | 50                             | 17.9 (0-51.2)                                            |
| 16              | 0.1                              | 0.8                                | 2.5                                                | 100                            | 27.9 (0.1-61.8)                                          |
| 17              | 0.1                              | 0.8                                | 3                                                  | 50                             | 51.7 (0.1-80.8)                                          |
| 18              | 0.1                              | 0.8                                | 3                                                  | 100                            | 65.5 (0.2-85.4)                                          |
| 19              | 1                                | 0                                  | 2                                                  | 50                             | 117.5 (17.7-659.1)                                       |
| 20              | 1                                | 0                                  | 2                                                  | 100                            | 192.9 (34.4-745.4)                                       |
| 21              | 1                                | 0                                  | 2.5                                                | 50                             | 608.2 (107.4-894.3)                                      |
| 22              | 1                                | 0                                  | 2.5                                                | 100                            | 718.5 (187.3-895.3)                                      |
| 23              | 1                                | 0                                  | 3                                                  | 50                             | 899.6 (409-944.6)                                        |
| 24              | 1                                | 0                                  | 3                                                  | 100                            | 921.1 (575.6-944.9)                                      |
| 25              | 1                                | 0.5                                | 2                                                  | 50                             | 6.9 (0.1-17.2)                                           |
| 26              | 1                                | 0.5                                | 2                                                  | 100                            | 14.8 (0.1-37)                                            |
| 27              | 1                                | 0.5                                | 2.5                                                | 50                             | 69.5 (0.1-135.3)                                         |
| 28              | 1                                | 0.5                                | 2.5                                                | 100                            | 151.3 (0.2-219.3)                                        |
| 29              | 1                                | 0.5                                | 3                                                  | 50                             | 416.4 (0.4-532.4)                                        |
| 30              | 1                                | 0.5                                | 3                                                  | 100                            | 564.5 (0.7-642.9)                                        |
| 31              | 1                                | 0.8                                | 2                                                  | 50                             | 2.3 (0-14.8)                                             |
| 32              | 1                                | 0.8                                | 2                                                  | 100                            | 5 (0.1-28.9)                                             |
| 33              | 1                                | 0.8                                | 2.5                                                | 50                             | 21.1 (0-103.4)                                           |
| 34              | 1                                | 0.8                                | 2.5                                                | 100                            | 48.9 (0.2-185.8)                                         |
| 35              | 1                                | 0.8                                | 3                                                  | 50                             | 165.6 (0.1-418.6)                                        |
| 36              | 1                                | 0.8                                | 3                                                  | 100                            | 294.9 (0.2-572.7)                                        |

| <b>Scenario</b> | <b>Cluster size (population)</b> | <b>Coverage of contact tracing</b> | <b>Basic reproduction number, <math>R_0</math></b> | <b>Initial number of cases</b> | <b>Estimates infections by day 90 (in '000) (95% CI)</b> |
|-----------------|----------------------------------|------------------------------------|----------------------------------------------------|--------------------------------|----------------------------------------------------------|
| 37              | 3                                | 0                                  | 2                                                  | 50                             | 115.7 (13-1727.3)                                        |
| 38              | 3                                | 0                                  | 2                                                  | 100                            | 234.9 (35-1955.7)                                        |
| 39              | 3                                | 0                                  | 2.5                                                | 50                             | 1012.4 (112.9-2655.8)                                    |
| 40              | 3                                | 0                                  | 2.5                                                | 100                            | 1540.5 (217-2677.8)                                      |
| 41              | 3                                | 0                                  | 3                                                  | 50                             | 2488.1 (622.8-2833.3)                                    |
| 42              | 3                                | 0                                  | 3                                                  | 100                            | 2647.9 (948.2-2834.1)                                    |
| 43              | 3                                | 0.5                                | 2                                                  | 50                             | 7.8 (0-20.4)                                             |
| 44              | 3                                | 0.5                                | 2                                                  | 100                            | 16.2 (0.2-36.4)                                          |
| 45              | 3                                | 0.5                                | 2.5                                                | 50                             | 81.2 (0.1-141)                                           |
| 46              | 3                                | 0.5                                | 2.5                                                | 100                            | 156.8 (0.2-281.1)                                        |
| 47              | 3                                | 0.5                                | 3                                                  | 50                             | 575.3 (0.3-867)                                          |
| 48              | 3                                | 0.5                                | 3                                                  | 100                            | 983.7 (0.6-1246.5)                                       |
| 49              | 3                                | 0.8                                | 2                                                  | 50                             | 2 (0-17.2)                                               |
| 50              | 3                                | 0.8                                | 2                                                  | 100                            | 4.3 (0.1-29)                                             |
| 51              | 3                                | 0.8                                | 2.5                                                | 50                             | 24.7 (0-99.9)                                            |
| 52              | 3                                | 0.8                                | 2.5                                                | 100                            | 39.9 (0.2-206.4)                                         |
| 53              | 3                                | 0.8                                | 3                                                  | 50                             | 192.3 (0.1-611.3)                                        |
| 54              | 3                                | 0.8                                | 3                                                  | 100                            | 395.6 (0.2-937.8)                                        |
